1                    **Hypocretin underlies the evolution of sleep loss in the Mexican cavefish**

2                    James B. Jaggard<sup>1</sup>, Bethany A. Stahl<sup>1</sup>, Evan Lloyd<sup>1</sup>, Erik R. Duboue<sup>2</sup> and Alex C. Keene<sup>1\*</sup>

3

4

5                    1. Department of Biological Sciences, Florida Atlantic University, Jupiter, FL 33458

6

7                    2. Department of Embryology, Carnegie Institution for Science, Baltimore, MD, 21218

8

9

10

11

12

13                    **\*Address Correspondence to:**

14                    Alex C. Keene

15                    Department of Biological Sciences

16                    Florida Atlantic University

17                    5353 Parkside Drive

18                    Jupiter, FL 33458, USA

19                    Email: [KeeneA@FAU.edu](mailto:KeeneA@FAU.edu)

20

21

22

1    **Abstract**

2    The duration of sleep varies dramatically between species, yet little is known about genetic  
3    bases or evolutionary factors driving this variation in behavior. The Mexican cavefish, *Astyanax*  
4    *mexicanus*, exists as surface populations that inhabit rivers, and multiple independently derived  
5    cave populations with convergent evolution on sleep loss. The number of Hypocretin/Orexin  
6    (HCRT)-positive hypothalamic neurons is increased significantly in cavefish, and HCRT is  
7    upregulated at both the transcript and protein levels. Pharmacological inhibition of HCRT  
8    signaling increases sleep duration in cavefish without affecting sleep in surface fish, suggesting  
9    enhanced HCRT signaling underlies sleep loss in cavefish. Ablation of the lateral line or  
10   starvation, manipulations that selectively promote sleep in cavefish, inhibit *hcrt* expression in  
11   cavefish while having little effect in surface fish. These findings provide the first evidence of  
12   genetic and neuronal changes that contribute to the evolution of sleep loss, and support a  
13   conserved role for HCRT in sleep regulation.

14

15

1

## 2 **Introduction**

3 Sleep behavior is nearly ubiquitous throughout the animal kingdom and vital for many aspects of  
4 biological function (Campbell and Tobler, 1984; Hartmann, 1973; Musiek et al., 2015). While  
5 animals display remarkable diversity in sleep duration and architecture, little is known about the  
6 functional and evolutionary principles driving these differences (Allada and Siegel, 2008;  
7 Capellini et al., 2008; Siegel, 2005). We have previously identified the convergent evolution of  
8 sleep loss in the blind Mexican cavefish, *Astyanax mexicanus*, resulting in a striking 80%  
9 reduction in total sleep duration in independently derived cave-dwelling populations compared  
10 to extant surface fish without apparent adverse impacts on health or development (Duboué et  
11 al., 2011). The robust differences in sleep provide a unique model for investigating the genetic  
12 basis for sleep variation and identification of novel mechanisms underlying the evolution of  
13 sleep regulation.

14 The *Astyanax mexicanus* species consists of eyed 'surface' populations that inhabit open rivers  
15 in the Sierra del Abra region of Northeast Mexico, and at least 29 distinct populations of  
16 cavefish (Mitchell et al., 1977). Cavefish are derived from surface ancestors, which arose from  
17 colonization events within the past 2-5 million years (Gross, 2012; Jeffery, 2009; Keene et al.,  
18 2015). Independently-evolved cave populations of *A. mexicanus* share multiple morphological  
19 and developmental phenotypes including reduced size or complete absence of eyes and loss of  
20 pigmentation (Borowsky, 2008a; Gross and Wilkens, 2013; Protas et al., 2006). In addition,  
21 cavefish display an array of behavioral changes including reduced schooling, enhanced  
22 vibration attraction behavior, hyperphagia, and sleep loss (Duboué et al., 2011; Kowalko et al.,  
23 2013; Mcgaugh et al., 2014; Yoshizawa et al., 2010). Convergent evolution of shared traits in  
24 independent cavefish populations, combined with robust phenotypic differences with extant  
25 surface fish populations provides a system to examine how naturally occurring variation and

1 evolution shape complex biological traits.

2 While the ecological factors underlying phenotypic changes in cave populations are unclear,  
3 food availability and foraging strategy are hypothesized to be potent drivers of evolutionary  
4 change that contribute to the variation in sleep duration across animal species (Siegel, 2005).  
5 Many caves inhabited by *A. mexicanus* are nutrient poor compared to the above-ground river  
6 surrounding them (Mitchell et al., 1977), and previous field studies suggest cavefish subsist  
7 primarily off of bat guano, small insects, and organic matter washed into the cave by seasonal  
8 floods (Keene et al., 2015; Mitchell et al., 1977). Supporting this notion, we previously found that  
9 sleep is increased selectively in cavefish during periods of prolonged starvation, raising the  
10 possibility that cavefish suppress sleep to forage during the wet season when food is plentiful,  
11 and increase sleep to conserve energy during the dry season when food is less abundant  
12 (Jaggard et al., 2017). Therefore, sleep loss in cavefish appears to be an evolved feature as a  
13 consequence of food availability, providing a model to examine interactions between sleep and  
14 metabolism.

15 Despite the robust phenotypic differences in sleep between *A. mexicanus* surface and cave  
16 populations, little is known about the neural mechanisms underlying the evolution of sleep loss  
17 in cavefish. Here, we investigate the role of the wake-promoting hypothalamic neuropeptide,  
18 Hypocretin/Orexin (HCRT) is highly conserved across vertebrates, and deficiencies in HCRT  
19 signaling are associated with increased sleep duration and narcolepsy (Chemelli et al., 1999;  
20 Lin et al., 1999; Prober et al., 2006). In zebrafish, HCRT is critical for normal sleep-wake  
21 regulation. Ectopic enhancement of *hcr*t expression increases locomotor activity, while deletion  
22 of *hcr*t or ablation of HCRT neurons increases daytime sleep= (Elbaz et al., 2012; Prober et al.,  
23 2006; Singh et al., 2015). Here, we report that HCRT is upregulated in cavefish, and  
24 pharmacological blockade of HCRT signaling selectively reduces sleep in cavefish. Further,  
25 HCRT expression is down-regulated in cavefish in response to sleep-promoting manipulations

1 including starvation and ablation of the lateral line. Together, these findings suggest plasticity of  
2 HCRT function underlies the evolved differences in sleep regulation in Mexican cavefish.

### 3 **Results**

4 Sleep is dramatically reduced in adult Pachón cavefish compared to surface fish counterparts  
5 (Fig. 1A, B) (Jaggard et al., 2017; Yoshizawa et al., 2015). To investigate the role of HCRT in  
6 cavefish, we compared sequence homology between surface fish and cavefish by a  
7 bioinformatic analysis of the sequences from the cavefish genome (Mcgaugh et al., 2014) and  
8 available full-length transcriptomic sequences (Gross et al., 2013). Alignment of the HCRT  
9 neuropeptide reveals that the *Astyanax* shares high sequence similarity to other fish species  
10 (35-48% percent identity) and mammals (35% percent identity), including conservation of  
11 domains that give rise to the HCRT neuropeptides (Fig. 1-S1; Wall and Volkoff, 2013). The  
12 HCRT peptide sequences of surface and Pachón cavefish are identical (100% percent identity).  
13 To determine if *hcr*t expression is altered in cavefish, we measured transcript levels in whole-  
14 brain extracts with quantitative real-time PCR (qPCR). Expression of *hcr*t was significantly  
15 elevated in Pachón cavefish to over three-fold the levels surface fish, raising the possibility that  
16 up-regulation of *hcr*t underlies sleep loss in Pachón cavefish (Fig. 1C). Neuropeptide levels  
17 were quantified by immunolabeling serial-sectioned brains, and examining the number of  
18 HCRT-positive cell bodies and the relative fluorescence of each cell under fed conditions (Fig 1-  
19 S2). The number of HCRT-positive cell bodies was significantly higher in Pachón cavefish  
20 compared to surface fish (Fig. 1D). Further, quantification of fluorescence intensity of individual  
21 cells revealed increased HCRT neuropeptide in cavefish (Fig. 1E-I). Enhanced levels of HCRT  
22 protein were also observed in 5 day post fertilization (dpf) larvae, suggesting the change in  
23 peptide levels were present at the time fish begin consuming food (Fig. 1-S3).

24 To directly assess the contributions of HCRT regulation to sleep loss, we measured the effect of  
25 HCRT receptor blockade on sleep in adult surface fish and Pachón cavefish. While mammals

1 possess two HCRT receptors (HCRTR1 and HCRTR2), zebrafish only possess HCRTR2 and  
2 our genome analysis revealed that both the cavefish and surface fish genomes encode only  
3 HCRTR2, which is proposed to be evolutionarily more ancient (Mcgaugh et al., 2014; Wong et  
4 al., 2011). Fish from both populations were bathed in the selective HCRTR2 pharmacological  
5 inhibitor, TCS0X229 (Plaza-Zabala et al., 2012). Surface fish sleep and maintenance of diurnal  
6 rhythms in light/dark conditions remained unchanged in the presence of 1 $\mu$ M or 10 $\mu$ M  
7 TCS0X229 (Fig. 2A, C). Conversely, treatment of TCS0X229 in Pachón cavefish increased  
8 sleep duration compared to solvent treated (DMSO) controls (Fig. 2B, C). While these results do  
9 not exclude the possibility that HCRT regulates sleep in surface fish, the sleep-promoting effect  
10 of TCS0X229 in Pachón cavefish suggests these fish are more sensitive to changes in HCRT  
11 signaling than surface fish. Treatment with TCS0X229 had no effect on waking velocity in  
12 surface fish or cavefish, suggesting that the increased quiescence observed in cavefish after  
13 drug treatment is not due to lethargy (Fig. 2D). Further analysis revealed that sleep-promoting  
14 effects of TCS0X229 in cavefish can be attributed to both an increase in bout number and bout  
15 duration, suggesting that HCRT blockade affects sleep onset and maintenance (Fig. 2E, F).  
16 Taken together, these findings support the notion that elevated HCRT signaling in cavefish  
17 underlies the evolution of sleep loss.

18 Sleep loss in *A. mexicanus* cavefish populations is conserved throughout development and  
19 previous studies have examined sleep in 25 dpf fry as well as in adults (Duboue et al, 2011;  
20 Yoshizawa et al, 2015). To determine whether blockade of HCRT signaling restores sleep in  
21 developing cavefish, we assessed the effect of TCS0X229 treatment on 25 dpf fry. Similar to  
22 findings in adults, TCS0X229 treatment did not affect sleep duration in surface fish (Fig. S4).  
23 Treatment significantly increased sleep in treated Pachón cavefish larvae by increasing bout  
24 length (Fig. 2-S1) indicating, the enhanced sensitivity to TCS0X229 during adulthood is  
25 conserved in early development.

1 Hypocretin neurons are modulated by sensory stimuli and feeding state, indicating that they are  
2 involved in the integration of environmental cues with sleep regulation. The number of  
3 mechanosensory neuromasts that comprise the lateral line, a neuromodulatory system used to  
4 detect waterflow, are increased in cavefish. This evolved trait is hypothesized to allow for an  
5 enhanced ability to forage object detection and social behaviors in the absence of eyes  
6 (Kowalko et al., 2013; Kulpa et al., 2015; Yoshizawa et al., 2010). We previously reported that  
7 ablation of the lateral line restores sleep to Pachón cavefish without affecting sleep in surface  
8 fish, raising the possibility that lateral input modulates HCRT signaling in cavefish to suppress  
9 sleep (Jaggard et al., 2017). To investigate the effects of lateral line input on HCRT, we pre-  
10 treated adult fish in the ototoxic antibiotic gentamicin, which effectively ablates the lateral line  
11 (Van Trump et al., 2010), and assayed sleep in adult cave and surface fish. In agreement with  
12 previous findings, gentamicin treatment fully ablated the lateral line (Fig. 3A-D) and restored  
13 sleep in cavefish without affecting sleep in surface fish (Jaggard et al., 2017; not shown). To  
14 determine the effect of lateral line ablation on HCRT regulation, we quantified *hcrt* expression or  
15 neuropeptide levels in adult cave and surface fish following gentamicin treatment. Quantitative  
16 PCR analysis of gentamicin treatment revealed that *hcrt* expression was significantly reduced in  
17 cavefish to levels equivalent to untreated surface fish (Fig. 3E). We observed a non-significant  
18 decrease in *hcrt* expression following gentamicin treatment in surface fish; however, the robust  
19 effect of lateral line ablation in cavefish indicates that the lateral line selectively enhances HCRT  
20 levels in cavefish. Comparison and detailed quantification of HCRT neuropeptide levels in the  
21 hypothalamus reveals that lateral line ablation does not impact the number of HCRT-positive  
22 hypothalamic neurons, but instead selectively reduces the level HCRT within each cell in  
23 cavefish (Fig. 3F-K), supporting the notion that the lateral line is required for enhances HCRT  
24 function in cavefish. Together, these findings reveal that sensory input from the lateral line  
25 promotes sleep and *hcrt* expression in Pachón cavefish, providing a link between sensory input  
26 and transcriptional regulation of a wake-promoting factor.

1 In addition to its potent role in sleep regulation, *hcrt* promotes food consumption in fish and  
2 mammals (Penney and Volkoff, 2014; Tsujino and Sakurai, 2013; Yokobori et al., 2011). We  
3 previously reported that prolonged starvation increases sleep in cavefish without affecting sleep  
4 in surface fish (Jaggard et al., 2017), but the role of HCRT in feeding-state dependent  
5 modulation of sleep-wake cycles has not been investigated. Quantitative PCR analysis from  
6 whole-brain extracts revealed that *hcrt* transcript is significantly reduced in cavefish following 30  
7 days of starvation; however, the same treatment does not affect *hcrt* transcription in surface  
8 fish, indicating that cavefish are more sensitive to starvation-dependent changes in HCRT (Fig.  
9 4A). To determine whether HCRT neuropeptide is produced in a greater number of cells during  
10 starvation, we quantified HCRT-positive neurons in fed and starved state (Fig. 4B-G). Similar to  
11 lateral line ablation, starvation reduced HCRT levels in each cell, without affecting the number of  
12 HCRT-positive neurons. Further, starvation did not affect the number of HCRT-positive cells or  
13 HCRT levels per cell in surface fish (Fig. 4B). These results indicate that the starvation  
14 modulates HCRT levels, rather than the number of cells that produce HCRT. The acute  
15 regulation of HCRT by feeding state and lateral-line dependent sensory input demonstrates a  
16 unique link between these neuronal systems and those mediating sleep/wake cycles.



## 1 Discussion

2 Cavefish are a unique model for investigating neural and genetic regulation of sleep, particularly  
3 from an evolutionary vantage point. Robust phenotypic differences have been observed in  
4 multiple populations of cavefish, but our findings provide the first evidence of altered regulation  
5 at transcript and protein levels of a neuromodulatory peptide associated with the evolution of  
6 sleep loss. Alignment of *hcrt* sequences derived from surface and Pachón cavefish indicate that  
7 there are no differences in the genomic sequences between the two morphs. Our findings do,  
8 however, reveal dramatic differences in *hcrt* expression and neuron number between surface  
9 fish and cavefish, raising the possibility that regulation of *hcrt* is under evolutionary pressure.  
10 These findings suggest that functional differences between surface fish and cavefish likely occur  
11 at the level of differences in genomic enhancers or neuronal connectivity that affect *hcrt*  
12 expression. Because our findings also reveal an increased number of HCRT-positive neurons  
13 from an early in development, it is also likely that developmental differences between the brains  
14 of surface and cavefish underlie differences in *hcrt* function. Examination of cell body number in  
15 six-day-old fry reveals increased HCRT-positive neurons in cavefish, indicating HCRT  
16 differences are present during early development. In agreement with these findings, broad  
17 anatomical differences in forebrain structure have previously been documented between  
18 surface fish and cavefish including an expanded hypothalamus (Menuet et al., 2007). Therefore,  
19 it is likely that developmentally-derived differences in the number of HCRT-positive neurons and  
20 modified hypothalamic neural circuitry contribute sleep loss in cavefish.

21 While the neural processes regulating HCRT activity are not fully understood, growing evidence  
22 suggests these neurons integrate sleep-wake regulation with responses to sensory stimuli  
23 (Mileykovskiy et al., 2005; Woods et al., 2014). In mice, HCRT neurons are transiently activated  
24 by sound, feeding, and cage exploration, suggesting that HCRT neurons are generally regulated  
25 by external stimuli (Mileykovskiy et al., 2005). Further in zebrafish, overexpression of HCRT

1 enhances locomotor response to sensory stimuli including light, a dark flash and mechanical  
2 stimulation while ablation of HCRT neurons reduces response to sound stimulus (Elbaz et al.,  
3 2012; Prober et al., 2006; Woods et al., 2014), suggesting that HCRT neurons mediate sensory  
4 responsiveness and sleep-wake behavior. Our findings reveal that ablation of the lateral line in  
5 cavefish reduces *hcrt* transcript and neuropeptide abundance to levels indistinguishable from  
6 their surface fish conspecifics, indicating that lateral line input is a potent regulator of *hcrt*  
7 production in cavefish. These discoveries postulate that evolution of sensory systems  
8 dramatically affects central brain processes that regulate behavior, and provide further support  
9 that HCRT neurons integrate sensory stimuli to modulate sleep and arousal.

10 Hypocretin is highly conserved and has been shown to promote wakefulness in species  
11 including in animals ranging from zebrafish to humans (Appelbaum et al., 2009; Chemelli et al.,  
12 1999; Mileykovskiy et al., 2005). Moreover, the Hypocretin system has been characterized in  
13 detail in zebrafish and appears to be a key mediator of arousal (Appelbaum et al., 2009; Elbaz  
14 et al., 2012; Kaslin et al., 2004; Prober et al., 2006). Our findings suggest that regulation of  
15 HCRT signaling may be subject to evolutionary pressure, and implicate it as a ‘hot-spot’ for  
16 variation in sleep throughout the animal kingdom.

17 While a full understanding of the neural circuitry regulating HCRT-positive neurons has not been  
18 determined, HCRT neurons send projections to numerous areas implicated in behavioral  
19 regulation including the periventricular hypothalamus, the raphe, and thalamic nuclei (Panula,  
20 2010). Evidence suggests that wake-promoting role of HCRT neurons is dependent  
21 norepinephrine signaling, and optogenetic activation of HCRT neurons activates the locus  
22 coeruleus (Singh et al., 2015), raising the possibility that activation of this arousal pathway is  
23 enhanced in Pachón cavefish. We previously demonstrated that treating cavefish with the  $\beta$ -  
24 adrenergic inhibitor propranolol restores sleep in cavefish without affecting sleep in surface fish,  
25 similar to findings observed in this study in fish pharmacologically treated with the HCRT

1 receptor inhibitor TCS0X229. (Duboué et al., 2012). Therefore, it is possible that differences in  
2 norepinephrine signaling contribute to sleep loss in cavefish. Further investigation of the  
3 synergistic effects of norepinephrine and *hcrt* in surface and cavefish, and the effects of their  
4 pre-supposed interaction on feeding- and sensory-mediated *hcrt* production, will be critical in  
5 our understanding of how sleep changes can be driven by alterations in the environment.

6 In addition to its role in sleep-wake regulation, *hcrt* neurons regulate feeding and metabolic  
7 function, raising the possibility that HCRT neurons are integrators of sleep and metabolic state.  
8 Previous findings reveal that injection of HCRT peptide increases food consumption in cavefish,  
9 suggesting the consummatory behavior induced by HCRT in mammals is conserved in *A.*  
10 *mexicanus* (Penney and Volkoff, 2014; Wall and Volkoff, 2013) In addition, studies in mammals  
11 and zebrafish indicate the *hcrt* neurons are regulated by the adipose peptide hormone, Leptin  
12 (Levitas-Djerbi et al, 2015). Adipose levels – white? -in cavefish are elevated compared to  
13 surface fish (Aspiras et al., 2015), and it is possible that prolonged starvation reduces leptin  
14 levels, thereby inhibiting *hcrt* expression to promote sleep in cavefish. These findings indicate  
15 that cavefish provide a model for examining the leptin-hcrt axis and, more generally, interactions  
16 between sleep and metabolic function.

17 Our findings specifically examine neural mechanism underlying sleep loss in the Pachón cave  
18 populations. Both morphological and genomic data suggest Pachón cavefish are one of the  
19 oldest, and most troglomorphic of the 29 *A. mexicanus* cavefish populations (Bradic et al., 2012;  
20 Dowling et al., 2002; Ornelas-García et al., 2008; Strecker et al., 2003).. We have also  
21 demonstrated evolutionary convergence on sleep loss in other populations of cavefish, including  
22 Molino, Tinaja and Chica cave populations (Jaggard et al., 2017). However, ablation of the  
23 lateral line has no effect on sleep in Molino, Tinaja and Chica populations, suggesting distinct  
24 neural mechanism underlie sleep loss between Pachón cavefish, and other cavefish populations  
25 assayed (Jaggard et al., 2017). Future studies will reveal if enhanced HCRT function represents

1 a conserved mechanism for sleep loss, or that sleep loss in other fish populations is HCRT  
2 independent.

3

4

## 1 **Materials and Methods**

### 2 **Fish maintenance and rearing**

3 Animal husbandry was carried out as previously described (Borowsky, 2008b) and all protocols  
4 were approved by the IACUC Florida Atlantic University. Fish were housed in the Florida  
5 Atlantic University core facilities at 21°C±1°C constant water temperature throughout rearing for  
6 behavior experiments (Borowsky, 2008b). Lights were kept on a 14:10 hr light-dark cycle that  
7 remained constant throughout the animal's lifetime. Light intensity was kept between 25-40 Lux  
8 for both rearing and behavior experiments. All fish used for experiments were raised to  
9 adulthood and housed in standard 18-37L tanks. Adult fish were fed a mixture diet of black  
10 worms to satiation twice daily at zeitgeber time (ZT) 2 and ZT12, (Aquatic Foods, Fresno, CA,) and  
11 standard flake fish food during periods when fish were not being used for behavior  
12 experiments or breeding (Tetramine Pro).

13

### 14 **Sleep behavior**

15 Adult fish were recorded in standard conditions in 10L tanks with custom-designed partitions  
16 that allowed for five fish (2L/fish) to be individually housed in each tank as previously described  
17 (Yoshizawa et al., 2015). Recording chambers were illuminated with custom-designed IR LED  
18 source (Infrared 850 nm 5050 LED Strip Light, Environmental Lights). After a 4-5 day  
19 acclimation period, behavior was recorded for 24hrs beginning ZT0-ZT2. Videos were recorded  
20 at 15 frames/sec using a USB webcam (LifeCam Studio 1080p HD Webcam, Microsoft) fitted  
21 with a zoom lens (Zoom 7000, Navitar). An IR high-pass filter (Edmund Optics Worldwide) was  
22 placed between the camera and the lens to block visible light. For larval fish recordings,  
23 individual fish were placed in 12 well tissue culture plates (BD Biosciences). Recording  
24 chambers were lit with a custom-designed IR LED light strip and placed beneath the recording  
25 platform. Fish were allowed to acclimate for 24 hours before starting behavioral recordings.

1 Videos were recorded using Virtualdub, a video-capturing software (Version 1.10.4) and were  
2 subsequently processed using Ethovision XT 9.0 (Noldus, IT). Water temperature and chemistry  
3 were monitored throughout recordings, and maintained at standard conditions in all cases.  
4 Ethovision tracking was setup as previously described (Yoshizawa et al., 2015). Data was then  
5 processed using Perl scripts (v5.22.0, developed on-site) and Excel macro (Microsoft)  
6 (Yoshizawa et al., 2015). These data were used to calculate sleep information by finding bouts  
7 of immobility of 60sec and greater, which are highly correlated with increased arousal threshold,  
8 one of the hallmarks of sleep (Yoshizawa et al., 2015). For drug treatment studies, fish were  
9 allowed normal acclimation periods, followed by 24hrs of baseline recording. At ZT0 fish were  
10 treated with either control dimethyl sulfoxide solvent (0.1% DMSO) or freshly prepared  
11 TCS0X229 (Tocris) (Plaza-Zabala et al., 2012) dissolved into each 2-gallon tank system and  
12 behavior was recorded for 24hrs.

### 13 **Vital dye labeling and lateral line ablation**

14 Fish were treated with 0.002% gentamicin sulfate as previously described (Sigma Aldrich 1405-  
15 41-0) (Van Trump et al., 2010). Following baseline sleep recording and neuromast imaging, fish  
16 were bathed in gentamicin for 24hrs. Following the treatment, a complete water change was  
17 administered and behavior was again recorded for 24hrs. Fish treated with gentamicin were  
18 housed in separate tanks for at least 1 month after treatment in order to avoid contamination.  
19 Lateral line re-growth was measured with DASPEI staining two weeks following ablation to  
20 confirm that there were no long-term effects from the ablation treatments.

### 21 **Sequence analysis**

22 To compare Hypocretin/Orexin (HCRT), we aligned the accessioned protein sequences of *A.*  
23 *mexicanus* surface fish ([SRR639083.116136.2](https://www.ncbi.nlm.nih.gov/nuccore/SRR639083.116136.2), SRA) and Pachón cavefish  
24 (ENSAMXP00000000478) to orthologous HCRT in zebrafish (ENSARP000000095322),  
25 Medaka (ENSORLP00000004866), Tetraodon (ENSTNIP00000014660), mouse

1 (ENSMUSP00000057578) and human (ENSP00000293330). Protein alignment, neighbor  
2 joining tree (cladogram) and sequences analyses were performed with Clustal Omega (v.1.2.1,  
3 EMBL-EBI, (Sievers et al., 2011)). HCRT domains (PF02072/IPR001704) were determined  
4 using Ensembl genome browser (v.83, EMBL-EBI/Sanger) and PFam/Interpro (v.28.0, EMBL-  
5 EBI).

6

### 7 **Quantitative PCR (qPCR)**

8 To measure levels of *hcrt* mRNA, whole brains of one-two year old fish were extracted  
9 immediately after behavior was recorded (ZT2). After extraction, individual brains were frozen  
10 and homogenized in trizol (QIAGEN, Valencia,CA). RNA was extracted with an RNeasy Mini Kit  
11 (QIAGEN, Valencia,CA). All RNA samples were standardized to 10ng/μL concentrations and  
12 cDNA synthesis was carried out using iScript (BioRad, Redmond, WA). RT-qPCR was carried  
13 out using SsoAdvanced Universal SYBR Green Supermix (BioRad, Redmond, WA). qPCR  
14 primers were used at an annealing temperature of 53.3°C; their sequences follow: *hcrt* forward  
15 5'-CAT-CTC-CTC-AGC-CAA-GGT-TT-3', *hcrt* reverse 5'-TAG-AGT-CCG-TGC-TGT-TAC-ACC-  
16 3'. Two housekeeping genes were amplified with the following primers: *rpl13a* forward 5'-TCT-  
17 GAA-GGA-CTG-TAA-GAG-GTA-TGC-3', *rpl13a* reverse 5'-AGA-CGC-ACA-ATC-TTG-AGA-  
18 GCA-G-3'; *gapdh* forward 5'-GTG-TCC-ACA-GAC-TTC-AAC-GG-3', *gapdh* reverse 5'-CAT-TGT-  
19 CAT-ACC-ATG-TCA-CCA-G-3'. The following qPCR protocol was run on a Bio Rad CFX96 with  
20 a C1000 thermal cycler: 95.0°C for 3min followed by a plate read at 95.0°C for 10sec to 53.3°C  
21 for 30sec followed by a plate read repeated 39 times. All samples were compiled into Bio Rad  
22 CFX manager gene study (version 3.1) to account for inter-run calibration. All samples were  
23 normalized to one (relative to surface fish controls).

24

### 25 **Immunohistochemistry**

1 Following euthanasia in MS-222 (Sigma) and ice-water, brains were immediately dissected from  
2 adults in ice-cold PBS and fixed overnight in 4% Paraformaldehyde/1x PBS (PFA). Adult brains  
3 were then placed in 20% sucrose for cryoprotection overnight or until the brains sunk to the  
4 bottom of the well (Kaslin et al, 2004). Whole brains were then flash frozen and mounted in OCT  
5 compound (23-730-571 Fisher scientific) for sectioning. Whole brains were serial sectioned in  
6 50 µm slices, all slices were floated in PBS to rinse out embedding solution. Slice sections were  
7 then washed in 0.5% Triton-X 100/PBS (PBT) for 3X 15 minutes and co-incubated in 0.5% PBT  
8 and 2% Bovine serum albumin (BSA) (Sigma) with primary antibody anti-ORX-A 1:2000  
9 (AB3704 EMD Millipore) overnight at 4°C in . The slices were rinsed again in 0.5% PBT, 3X for  
10 15 minutes and placed in secondary antibody 1:600 (Goat anti-rabbit 488; Life Technologies) for  
11 90 minutes at room temperature. Slices were mounted on slides in Vectashield with DAPI  
12 (VectorLabs) and imaged on a Nikon A1 confocal microscope. Whole-mount larvae were fixed  
13 overnight in 4% PFA, rinsed 3X 15 min in 0.5% PBT, then placed in 0.5% PBT with 2% BSA  
14 and primary antibody anti-ORX-A 1:2000 overnight. Following 3X 15 min 0.5% PBT rinse, larvae  
15 were placed in secondary antibody 1:600. Larvae were then placed in Vectashield with DAPI  
16 until mounted in 2% low melt temp agarose (Sigma) for imaging. All samples were imaged in  
17 2µm sections and are presented as the Z-stack projection through the entire brain. For  
18 quantification of HCRT levels, all hypothalamic slices were imaged in 2µm sections, merged into  
19 a single Z-stack as maximum fluorescence, and the total brain fluorescence was determined by  
20 creating individual ROIs for each cell expressing HCRT.

21

## 22 **Statistics**

23 Two-way ANOVA tests were carried out to test the effects of pharmacological and starvation  
24 paradigms among different groups and populations on behavior. Each was modeled as a  
25 function of genotype (Surface and Pachón) and genotype by treatment interaction (TCS,  
26 gentamicin, or starvation, respectively). Significance for all tests was set at  $p < 0.05$ . When the



1 ANOVA test detected significance, the Holm-Sidak multiple comparison post-test was carried  
2 out to correct for the number of comparisons. For comparison of two baseline groups, non-  
3 parametric t-tests were carried out to test for significance. All statistical analysis were carried out  
4 using SPSS (IBM, 22.0) or InStat software (GraphPad 6.0).

5

## 6 **Acknowledgements**

7 This work was funded by National Science Foundation Award IOS-125762 to ACK. The authors  
8 are grateful to Masato Yoshizawa (Hawai'i) for technical guidance and the Department of  
9 Comparative Medicine at FAU for support maintaining the fish facility.

## 10 **Competing Interests**

11 There are no competing interests associated with this work.

12

## 1   **References**

- 2   Allada, R., and Siegel, J.M. (2008). Unearthing the phylogenetic roots of sleep. *Curr. Biol.* *18*,
- 3   R670–R679.
- 4   Appelbaum, L., Wang, G.X., Maro, G.S., Mori, R., Tovin, A., Marin, W., Yokogawa, T.,
- 5   Kawakami, K., Smith, S.J., Gothilf, Y., Mignot, E., Murrain P.. (2009). Sleep-wake regulation
- 6   and hypocretin-melatonin interaction in zebrafish. *Proc. Natl. Acad. Sci. U. S. A.* *106*, 21942–
- 7   21947.
- 8   Aspiras, A., Rohner, N., Marineau, B., Borowsky, R., and Tabin, J. (2015). Melanocortin 4
- 9   receptor mutations contribute to the adaptation of cavefish to nutrient-poor conditions. *Proc.*
- 10   *Natl. Acad. Sci.* *112*, 9688–73.
- 11   Borowsky, R. (2008a). Restoring sight in blind cavefish. *Curr. Biol.* *18*, R23–R24.
- 12   Borowsky, R. (2008b). Handling *Astyanax mexicanus* eggs and fry. *Cold Spring Harb. Protoc.* *3*.
- 13   Bradic, M., Beerli, P., Garcia-de Leon, F.J., Esquivel-Bobadilla, S., and Borowsky, R.L. (2012).
- 14   Gene flow and population structure in the Mexican blind cavefish complex (*Astyanax*
- 15   *mexicanus*). *BMC Evol. Biol.* *12*, 9 doi:10.1186/1471-2148-12-9.
- 16   Campbell, S.S., and Tobler, I. (1984). Animal sleep: a review of sleep duration across
- 17   phylogeny. *Neurosci. Biobehav. Rev.* *8*, 269–300.
- 18   Capellini, I., Barton, R.A., McNamara, P., Preston, B.T., and Nunn, C.L. (2008). Phylogenetic
- 19   analysis of the ecology and evolution of mammalian sleep. *Evolution (N. Y.)*. *62*, 1764–1776.
- 20   Chemelli, R.M., Willie, J.T., and Sinton, C.M., Elmquist, J.K., Scammell, T., Lee, C.,
- 21   Richardson, J.A., Williams, S.C. (1999). Narcolepsy in orexin knockout mice: Molecular genetics
- 22   of sleep regulation. *Cell* *98*, 437–451.

- 1 Dowling, T.E., Martasian, D.P., and Jeffery, W.R. (2002). Evidence for multiple genetic forms  
2 with similar eyeless phenotypes in the blind cavefish, *Astyanax mexicanus*. *Mol. Biol. Evol.* *19*,  
3 446–455.
- 4 Duboué, E.R., Keene, A.C., and Borowsky, R.L. (2011). Evolutionary convergence on sleep loss  
5 in cavefish populations. *Curr. Biol.* *21*, 671–676.
- 6 Duboué, E.R., Borowsky, R.L., and Keene, A.C. (2012).  $\beta$ -adrenergic signaling regulates  
7 evolutionarily derived sleep loss in the mexican cavefish. *Brain. Behav. Evol.* *80*, 233–243.
- 8 Elbaz, I., Yelin-Bekerman, L., Nicenboim, J., Vatine, G., and Appelbaum, L. (2012). Genetic  
9 Ablation of Hypocretin Neurons Alters Behavioral State Transitions in Zebrafish. *J. Neurosci.* *32*,  
10 12961–12972.
- 11 Gross, J.B. (2012). The complex origin of *Astyanax* cavefish. *BMC Evol. Biol.* *12*, 105  
12 doi:10.1186/1471-2148-12-105.
- 13 Gross, J.B., and Wilkens, H. (2013). Albinism in phylogenetically and geographically distinct  
14 populations of *Astyanax* cavefish arises through the same loss-of-function *Oca2* allele. *Heredity*  
15 (Edinb). *111*, 122–130.
- 16 Gross, J.B., Furterer, A., Carlson, B.M., and Stahl, B.A. (2013). An Integrated Transcriptome-  
17 Wide Analysis of Cave and Surface Dwelling *Astyanax mexicanus*. *PLoS One* *8*.
- 18 Hartmann, E.L. (1973). *The Functions of Sleep* (Yale University Press).
- 19 Jaggard, J., Robinson, B., Stahl, B., Oh, I., Masek, P., Yoshizawa, M., and Keene, A. (2017).  
20 The lateral line confers evolutionarily derived sleep loss in the Mexican cavefish. *J. Exp. Biol.* *in*  
21 *press*.
- 22 Jeffery, W.R. (2009). Regressive Evolution in *Astyanax* Cavefish. *Annu. Rev. Genet.* *43*, 25–47.

- 1 Kaslin, J., Nystedt, J.M., Ostergård, M., Peitsaro, N., and Panula, P. (2004). The  
2 orexin/hypocretin system in zebrafish is connected to the aminergic and cholinergic systems. *J.*  
3 *Neurosci.* *24*, 2678–2689.
- 4 Keene, A., Yoshizawa, M., and McGaugh, S. (2015). *Biology and Evolution of the Mexican*  
5 *Cavefish* (New York: Academic Press).
- 6 Kowalko, J.E., Rohner, N., Rompani, S.B., Peterson, B.K., Linden, T.A., Yoshizawa, M., Kay,  
7 E.H., Weber, J., Hoekstra, H.E., Jeffery, W.R., Tabin, C. (2013). Loss of schooling behavior in  
8 cavefish through sight-dependent and sight-independent mechanisms. *Curr. Biol.* *23*, 1874–  
9 1883.
- 10 Kulpa, M., Bak-Coleman, J., and Coombs, S. (2015). The lateral line is necessary for blind  
11 cavefish rheotaxis in non-uniform flow. *J. Exp. Biol.* *218*, 1603–1612.
- 12 Lin, L., Faraco, J., Li, R., Kadotani, H., Rogers, W., Lin, X., Qiu, X., De Jong, P.J., Nishino, S.,  
13 and Mignot, E. (1999). The sleep disorder canine narcolepsy is caused by a mutation in the  
14 hypocretin (orexin) receptor 2 gene. *Cell* *98*, 365–376.
- 15 Mcgaugh, S., Gross, J.B., Aken, B., Blin, M., Borowsky, R., Chalopin, D., Hinaux, H., Jeffery,  
16 W., Keene, A., Ma, L., Reteaux, S., Rohner, N., Searle, S.M., Stahl, B.A., Tabin, C., Volf, J.N.,  
17 Yoshizawa, M., Warren, W.C. (2014). The cavefish genome reveals candidate genes for eye  
18 loss. *Nat. Commun.* *5*, 5307.
- 19 Menuet, A., Alunni, A., Joly, J.-S., Jeffery, W.R., and Rétaux, S. (2007). Expanded expression  
20 of Sonic Hedgehog in *Astyanax* cavefish: multiple consequences on forebrain development and  
21 evolution. *Development* *134*, 845–855.
- 22 Mileykovskiy, B.Y., Kiyashchenko, L.I., and Siegel, J.M. (2005). Behavioral correlates of activity  
23 in identified hypocretin/orexin neurons. *Neuron* *46*, 787–798.

- 1 Mitchell, R.W., Russell, W.H., and Elliott, W.R. (1977). Mexican eyeless characin fishes, genus  
2 *Astyanax*: Environment, distribution, and evolution. (Texas: Texas Tech Press).
- 3 Musiek, E.S., Xiong, D.D., and Holtzman, D.M. (2015). Sleep, circadian rhythms, and the  
4 pathogenesis of Alzheimer disease. *Exp. Mol. Med.* 47, e148.
- 5 Ornelas-García, C.P., Domínguez-Domínguez, O., and Doadrio, I. (2008). Evolutionary history  
6 of the fish genus *Astyanax* Baird & Girard (1854) (Actinopterygii, Characidae) in Mesoamerica  
7 reveals multiple morphological homoplasies. *BMC Evol. Biol.* 8, 340.
- 8 Panula, P. (2010). Hypocretin/orexin in fish physiology with emphasis on zebrafish. In *Acta*  
9 *Physiologica*, pp. 381–386.
- 10 Penney, C., and Volkoff, H. (2014). Peripheral injections of cholecystokinin, apelin, ghrelin and  
11 orexin in cavefish (*Astyanax fasciatus mexicanus*): effects on feeding and on the brain  
12 expression levels of tyrosine hydroxylase, mechanistic target of rapamycin and appetite-related  
13 hormones. *Gen Comp Endocrinol* 196, 34–40.
- 14 Plaza-Zabala, A., Flores, Á., and Maldonado, R., Berrendero, F. (2012). Hypocretin/orexin  
15 signaling in the hypothalamic paraventricular nucleus is essential for the expression of nicotine  
16 withdrawal. *Biol. Psychiatry* 71, 214–223.
- 17 Prober, D.A., Rihel, J., Onah, A.A., Sung, R.-J., and Schier, A.F. (2006). Hypocretin/orexin  
18 overexpression induces an insomnia-like phenotype in zebrafish. *J. Neurosci.* 26, 13400–13410.
- 19 Protas, M.E., Hersey, C., Kochanek, D., Zhou, Y., Wilkens, H., Jeffery, W.R., Zon, L.I.,  
20 Borowsky, R., and Tabin, C.J. (2006). Genetic analysis of cavefish reveals molecular  
21 convergence in the evolution of albinism. *Nat. Genet.* 38, 107–111.
- 22 Siegel, J.M. (2005). Clues to the functions of mammalian sleep. *Nature* 437, 1264–1271.
- 23 Sievers, F., Wilm, A., Dineen, D., Gibson, T.J., Karplus, K., Li, W., Lopez, R., McWilliam, H.,

- 1 Remmert, M., Söding, J., Thompson, J.D., Higgins, D.G.. (2011). Fast, scalable generation of  
2 high-quality protein multiple sequence alignments using Clustal Omega. *Mol. Syst. Biol.* 7, 539.
- 3 Singh, C., Oikonomou, G., and Prober, D. (2015). Norepinephrine is required to promote  
4 wakefulness and for hypocretin-induced arousal in zebrafish. *Elife* 4, e070000.
- 5 Strecker, U., Bernatchez, L., and Wilkens, H. (2003). Genetic divergence between cave and  
6 surface populations of *Astyanax* in Mexico (Characidae, Teleostei). *Mol. Ecol.* 12, 699–710.
- 7 Van Trump, W.J., Coombs, S., Duncan, K., and McHenry, M.J. (2010). Gentamicin is ototoxic to  
8 all hair cells in the fish lateral line system. *Hear. Res.* 261, 42–50.
- 9 Tsujino, N., and Sakurai, T. (2013). Role of orexin in modulating arousal, feeding, and  
10 motivation. *Front. Behav. Neurosci.* 7, 28.
- 11 Wall, A., and Volkoff, H. (2013). Effects of fasting and feeding on the brain mRNA expressions  
12 of orexin, tyrosine hydroxylase (TH), PYY and CCK in the Mexican blind cavefish (*Astyanax*  
13 *fasciatus mexicanus*). *Gen. Comp. Endocrinol.* 183, 44–52.
- 14 Wong, K.K.Y., Ng, S.Y.L., Lee, L.T.O., Ng, H.K.H., and Chow, B.K.C. (2011). Orexins and their  
15 receptors from fish to mammals: A comparative approach. *Gen. Comp. Endocrinol.* 171, 124–  
16 130.
- 17 Woods, I.G., Schoppik, D., Shi, V.J., Zimmerman, S., Coleman, H.A., Greenwood, J., Soucy,  
18 E.R., and Schier, A.F. (2014). Neuropeptidergic signaling partitions arousal behaviors in  
19 zebrafish. *J. Neurosci.* 34, 3142–3160.
- 20 Yokobori, E., Kojima, K., Azuma, M., Kang, K.S., Maejima, S., Uchiyama, M., and Matsuda, K.  
21 (2011). Stimulatory effect of intracerebroventricular administration of orexin A on food intake in  
22 the zebrafish, *Danio rerio*. *Peptides* 32, 1357–1362.
- 23 Yoshizawa, M., Gorički, Š., Soares, D., and Jeffery, W.R. (2010). Evolution of a behavioral shift

1 mediated by superficial neuromasts helps cavefish find food in darkness. *Curr. Biol.* 20, 1631–  
2 1636.

3 Yoshizawa, M., Robinson, B., Duboue, E., Masek, P., Jaggard, J., O'Quin, K., Borowsky, R.,  
4 Jeffery, W., and Keene, A. (2015). Distinct genetic architecture underlies the emergence of  
5 sleep loss and prey-seeking behavior in the Mexican cavefish. *BMC Biol.* 20, 15.

6

7

8

9

## 1 **Figure Legends**

### 2 **Figure 1: Hypocretin transcript and peptide levels are elevated in Pachón cavefish.**

3 **A.** Representative images of surface fish and Pachón cavefish **B.** Sleep duration is significantly  
4 reduced in Pachón cavefish compared to surface morph (Unpaired t-test,  $t=5.56$ ,  $n=26$ ,  
5  $P<0.0001$ ). **C.** Expression of *hcrt* normalized by GAPDH and *rp13α* in adult whole-brain  
6 extracts is significantly enhanced in Pachón cavefish compared to surface fish (Unpaired t-test,  
7  $t=11.15$ ,  $n=8$ ,  $P<0.0001$ ). **D.** HCRT neuropeptide signal is significantly increased in Pachón  
8 cavefish compared to surface fish (Unpaired t-test,  $t=5.94$ ,  $n=8$ ,  $P<0.001$ ). **E.** The number of  
9 HCRT-positive cells in the hypothalamus is significantly increased in cavefish compared to  
10 surface fish (Unpaired t-test,  $t=9.984$ ,  $n=8$ ,  $P<0.0001$ ). **F-I.** Representative 2  $\mu\text{m}$  confocal  
11 images from coronal slices of surface fish or Pachón brains immunostained with anti-HCRT  
12 (green) and DAPI (white) **F.** Surface whole brain coronal slice. **G.** Pachón whole brain coronal  
13 slice. **H.** Surface fish dorsal hypothalamus containing HCRT positive cells **I.** Pachón cavefish  
14 dorsal hypothalamus containing HCRT neurons in view. Scale bar denotes 500 $\mu\text{m}$  (F,G); 50 $\mu\text{m}$   
15 (H,I).

### 16 **Figure 2. Pharmacological inhibition of HCRT Receptor 2 promotes sleep in Pachón**

17 **cavefish. A,B.** Twenty-four hour sleep profile in surface fish (A) Pachón cavefish (B) treated  
18 with DMSO (black), 1 $\mu\text{M}$  TCS (light blue) or 10 $\mu\text{M}$  TCS (dark blue). **C.** TCS treatment does not  
19 affect total sleep duration in surface fish (1 $\mu\text{M}$   $p>0.999$ ,  $n=12$ , 10  $\mu\text{M}$   $P>0.941$ ,  $n=12$ ). Pachón  
20 cavefish treated with 1 $\mu\text{M}$  TCS trended towards increased sleep ( $P>0.178$ ,  $n=12$ ) while  
21 treatment with 10 $\mu\text{M}$  significantly increased sleep ( $P<0.01$ ,  $n=13$ ;  $F(1, 73) = 25.00$ .) compared  
22 to control treated fish. **D.** Waking activity was not significantly altered in surface fish or cavefish  
23 or in response to drug treatment, 2-way ANOVA, ( $F(1, 73) = 2.73$ ,  $P>0.103$ ,  $n=79$ ) **E.** Treatment  
24 with TCS did not affect average sleep bout duration in surface fish (1  $\mu\text{M}$  TCS,  $P>0.430$ ,  $n=12$ ;  
25 10 $\mu\text{M}$  TCS,  $P>0.518$ ,  $n=12$ ) Treatment of Pachón cavefish with 1 $\mu\text{M}$  TCS trended towards



1 increased bout duration,  $P > 0.051$ ,  $n = 12$ , while  $10 \mu\text{M}$  TCS treatment significantly increased bout  
2 duration in Pachón cavefish, ( $P < 0.01$ ,  $n = 13$ ;  $F(1, 73) = 47.42$ ). **F.** TCS treatment did not affect  
3 total sleep bout number in surface fish  $1 \mu\text{M}$  TCS,  $P > 0.976$ ,  $n = 12$ ;  $10 \mu\text{M}$  TCS,  $P > 0.998$ ,  $n = 12$ .  
4 In Pachón cavefish, treatment with  $1 \mu\text{M}$  TCS did not affect sleep bout number ( $P > 0.828$ ,  $n = 12$ ).  
5 Treatment with  $10 \mu\text{M}$  TCS significantly increased bout duration in Pachón cavefish, ( $P < 0.001$ ,  
6  $n = 13$ ; 2-way ANOVA,  $F(1, 68) = 3.309$ ).

7 **Figure 3: Chemical ablation of mechanosensory lateral line reduces HCRT levels in**  
8 **Pachón cavefish. A-D.** Photomicrographs of surface fish cranial regions stained with DASPEI  
9 to reveal lateral line mechanosensory neuromasts. Treatment with gentamicin ablates lateral  
10 line neuromasts in surface fish (B) and Pachón cavefish (D) **E.** Gentamicin treatment has no  
11 significant effect on *hcrt* expression in surface fish ( $P > 0.635$ ,  $n = 8$ ) while in Pachón cavefish  
12 gentamicin treatment significantly reduces *hcrt* expression, restoring surface-like levels.  
13 (Pachón treated vs. untreated,  $P < 0.0001$ ; Pachón treated vs. surface untreated,  $P > 0.635$ ,  $n = 8$ ,  
14  $F(1, 28) = 21.28$ ). **F.** Fluorescent intensity per hypothalamic HCRT-cell was not altered with  
15 gentamicin treatment in surface fish,  $P = 0.590$ ,  $n = 4$ . In Pachón cavefish, HCRT neuropeptide  
16 levels are significantly lower following gentamicin treatment ( $P < 0.0001$ ,  $n = 4$ ; 2-way ANOVA,  $F$   
17  $(1, 13) = 0.0001$  **G.** Gentamicin treatment has no effect on total number of HCRT cell number in  
18 either surface or Pachón cavefish ( $P > 0.494$ ,  $n = 8$ ,  $F(1, 13) = 0.4967$ ). **H-K.** Representative  $2$   
19  $\mu\text{m}$  confocal images of the dorsal hypothalamic region in surface fish and Pachón cavefish  
20 immunostained with HCRT (green) and DAPI (white) **H.** Surface control **I.** Pachón control **J.**  
21 Surface gentamicin **K.** Pachón gentamicin. Scale bar =  $50 \mu\text{m}$

22 **Figure 4. Starvation selectively inhibits HCRT levels in cavefish A.** Starvation does not  
23 affect *hcrt* expression in surface fish ( $P > 0.832$ ,  $n = 4$ ) while *hcrt* expression is significantly  
24 reduced in Pachón cavefish ( $P > 0.001$ ,  $n = 4$ , 2-way ANOVA,  $F(1, 13) = 13.54$ ) **B.** Fluorescent

1 intensity in HCRT cells was not affected by 30 days starvation in surface fish ( $P>0.788$ ,  $n=4$ ). In  
2 Pachón cavefish, HCRT neuropeptide was significantly reduced following starvation ( $P<0.004$ ,  
3  $n=4$ , 2-way ANOVA,  $F(1,12)=10.17$ ) **C.** Starvation has no significant effect on total number of  
4 HCRT-positive cells in either surface or Pachón cavefish (Surface,  $P=0.452$ ,  $n=4$ ; Pachón,  
5  $P>0.979$ ,  $n=4$ , 2-way ANOVA,  $F(1,11)=3.65$ ) **D.** Surface control **E.** Pachón control **F.** Surface  
6 starved **G.** Pachón Starved. Scale bar =50  $\mu\text{m}$

## 7 **Supplementary Figures**

8 **Figure 1, Figure Supplement 1. HCRT sequence is identical between surface fish and**  
9 **Pachón cavefish. A.** Sequence alignment for HCRT in *A. mexicanus* reveals a homology of 35-  
10 48% percent identity compared to other fish species including zebrafish and medaka, and a  
11 35% percent identity conserved compared to mammalian HCRT. **B.** 5dpf Surface fish **C.** five dpf  
12 Pachón cavefish **D.** HCRT neuropeptide levels are significantly increased in five dpf Pachón  
13 larvae compared to surface (Unpaired t-test,  $t= 3.17$ ,  $df=10$ ,  $P=0.01$ ).

14 **Figure 1, Figure Supplement 2. HCRT peptide levels are increased in Pachón cavefish. A.**  
15 Surface fish whole brain from sagittal 2  $\mu\text{m}$  confocal slice **B.** Pachón cavefish whole brain  
16 sagittal 2  $\mu\text{m}$  confocal slice. **C.** Surface fish hypothalamus sagittal 2  $\mu\text{m}$  confocal slice. **D.** Pachón  
17 cavefish hypothalamus 2  $\mu\text{m}$  confocal slice

18 **Figure 1, Figure Supplement 3. Hypocretin levels are increased in early development in**  
19 **Pachón cavefish. A.** Five dpf whole-mount surface fish immunostained with anti-HCRT (green)  
20 and DAPI (white). **B.** Whole mount five dpf Pachón cavefish immunostained with anti-HCRT  
21 (Green) and DAPI (white). **C.** HCRT neuropeptide levels are significantly increased in five dpf  
22 Pachón larvae compared to surface (Unpaired t-test,  $t= 3.17$ ,  $df=10$ ,  $P<0.01$ ).

23 **Figure 2, Figure Supplement 1 HCRTR2 blockade selectively increases sleep in Pachón**

1 **cavefish. A,B.** Twenty-four hour sleep profiles of surface fish (A) and Pachón cavefish (B) **C.**  
2 TCS treatment did not affect sleep duration in surface fish (1 uM,  $p=0.782$ ,  $n=18$ , 10 uM  
3  $P>0.891$ ,  $n=18$ ) while Pachón cavefish increased total sleep duration in response to 10uM TCS  
4 treatment (1uM,  $P>0.116$ ,  $n=17$ ; 10uM,  $P<0.031$ ,  $n=18$ , 2-way ANOVA,  $F(2,88)=12.178$ ). **D.**  
5 Waking activity was not altered in either surface or cavefish, or with any drug treatment (2-way  
6 ANOVA,  $F(2,88)=0.297$ ; SF 1uM  $P>0.725$ ,  $n=18$ ; SF 10 uM  $P>0.341$ ,  $n=18$ ; Pa 1 uM  $P>0.997$ ,  
7  $n=17$ ; Pa 10 uM  $P>0.9350$ ,  $n=18$ ). **E.** Sleep bout duration was not significantly changed in  
8 response to TCS treatment in either surface or Pachón (Surface 1  $\mu$ M TCS,  $P>0.231$ ,  $n=18$ ;  
9 Surface 10  $\mu$ M,  $P=0.921$ ,  $n=18$ ; Pachón 1  $\mu$ M TCS,  $P>0.085$ ,  $n=17$ ; Pachón 10  $\mu$ M TCS,  
10  $P>0.232$ ,  $n=18$ ; 2-way ANOVA,  $F(2,88) =0.426$ ) **F.** Total sleep bout number was not  
11 significantly changed in surface fish (Surface 1  $\mu$ M TCS,  $P>0.295$ ,  $n=18$ ; surface 10  $\mu$ M TCS,  
12  $P>0.999$ ,  $n=18$ ) while Pachón cavefish significantly increase total bout number in response to  
13 TCS treatment (Pachon 1  $\mu$ M TCS,  $P=0.177$ ,  $n=17$ ; Pachon 10  $\mu$ M TCS,  $P>0.450$ ,  $n=18$ ; 2-way  
14 ANOVA,  $F(2, 88)=3.175$ )

15

16

17

18

## Figure 1

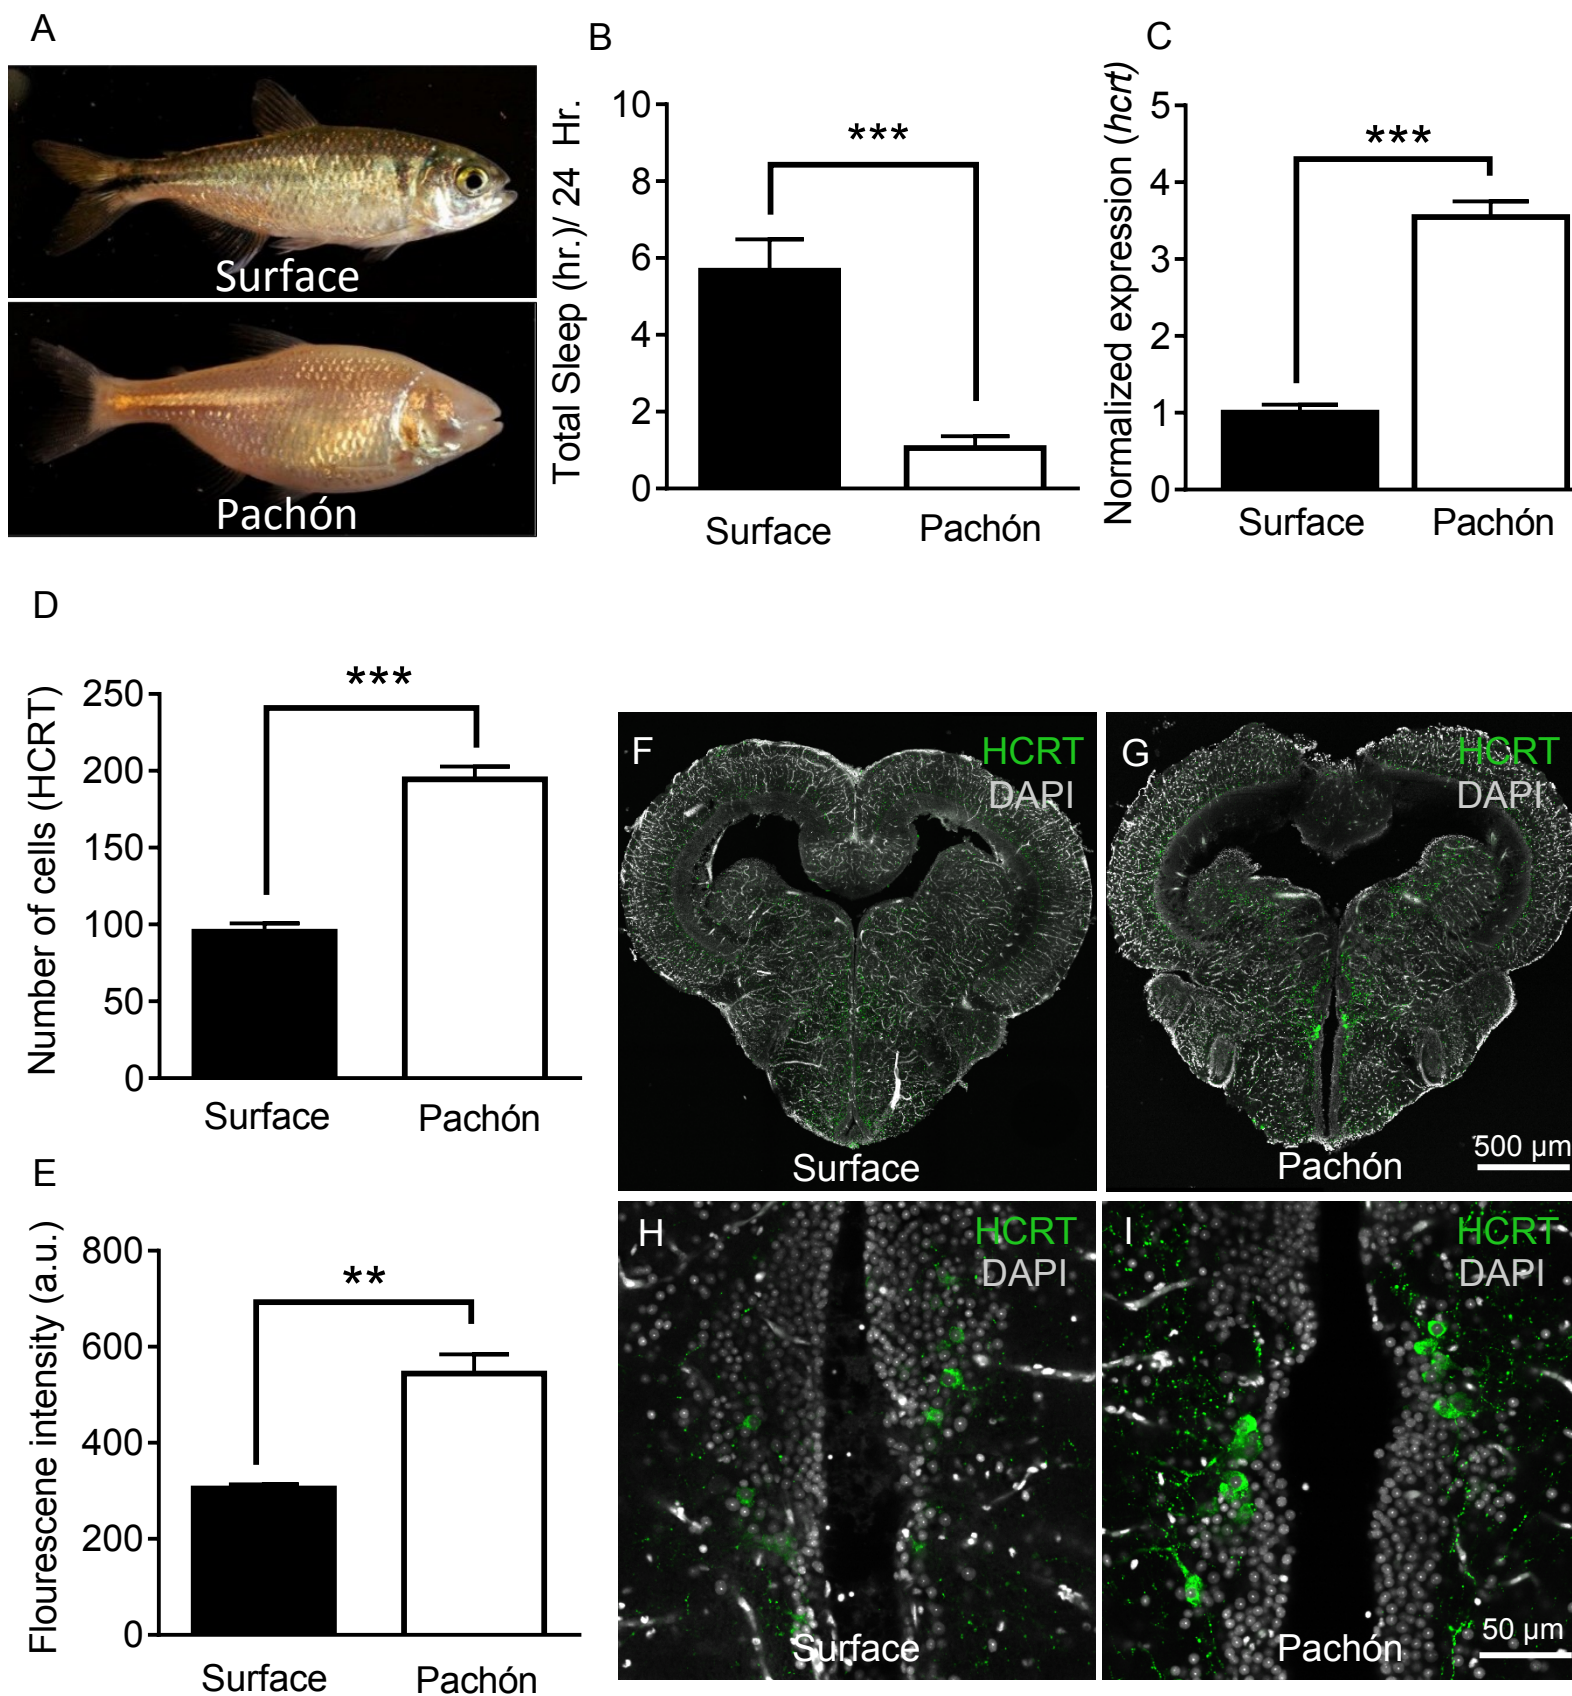

## Figure 2

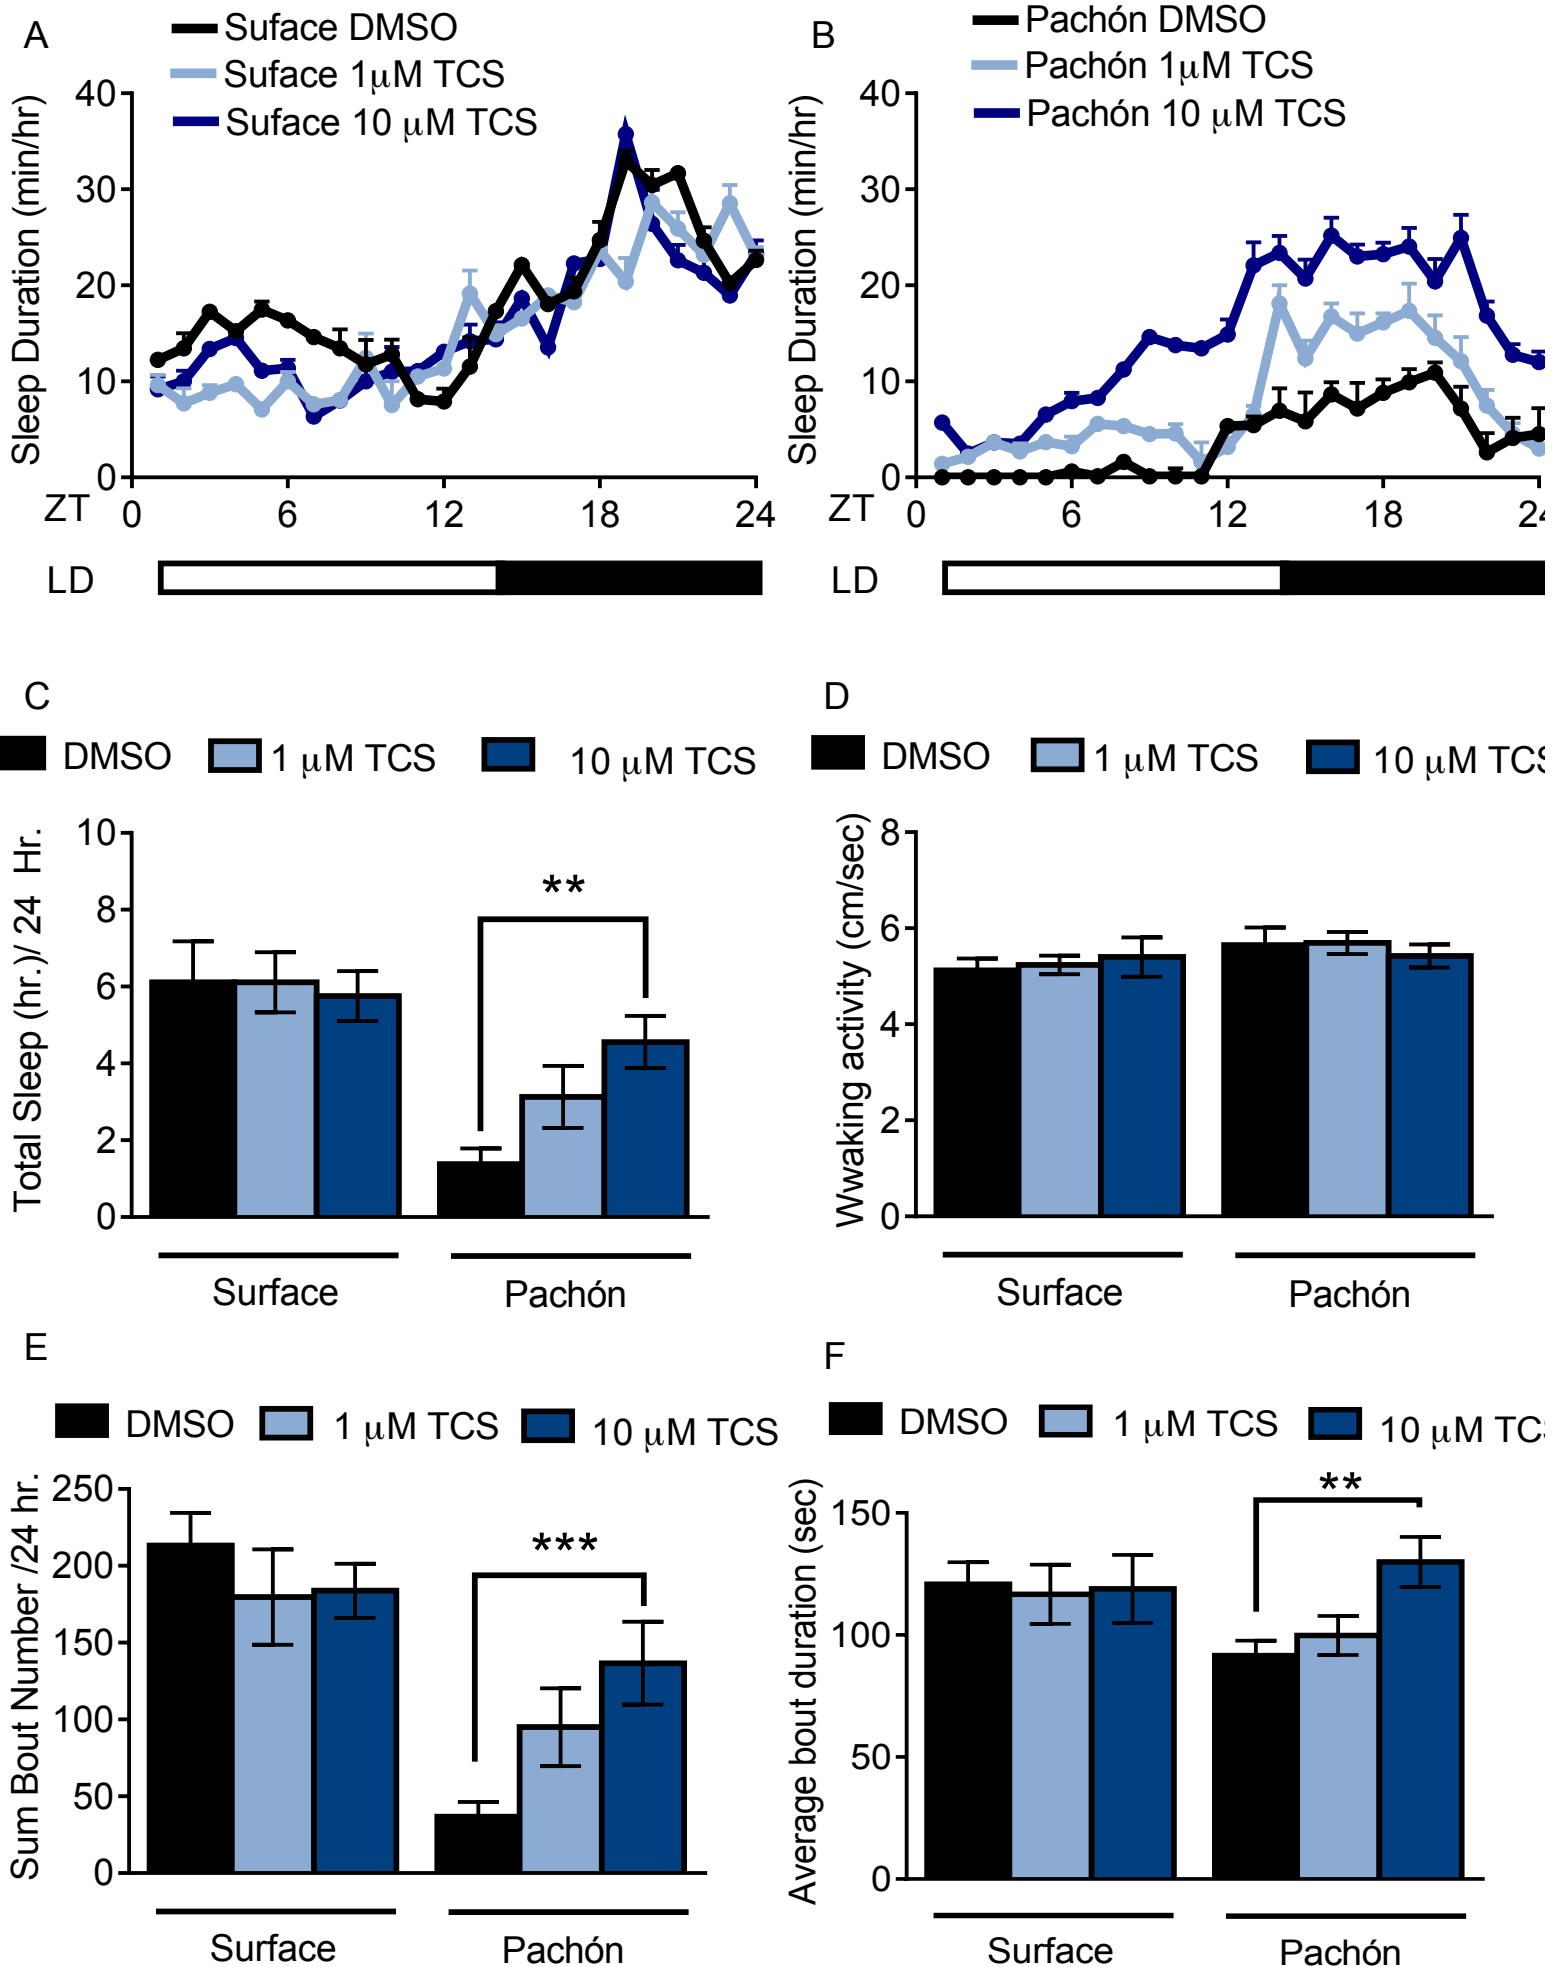

### Figure 3

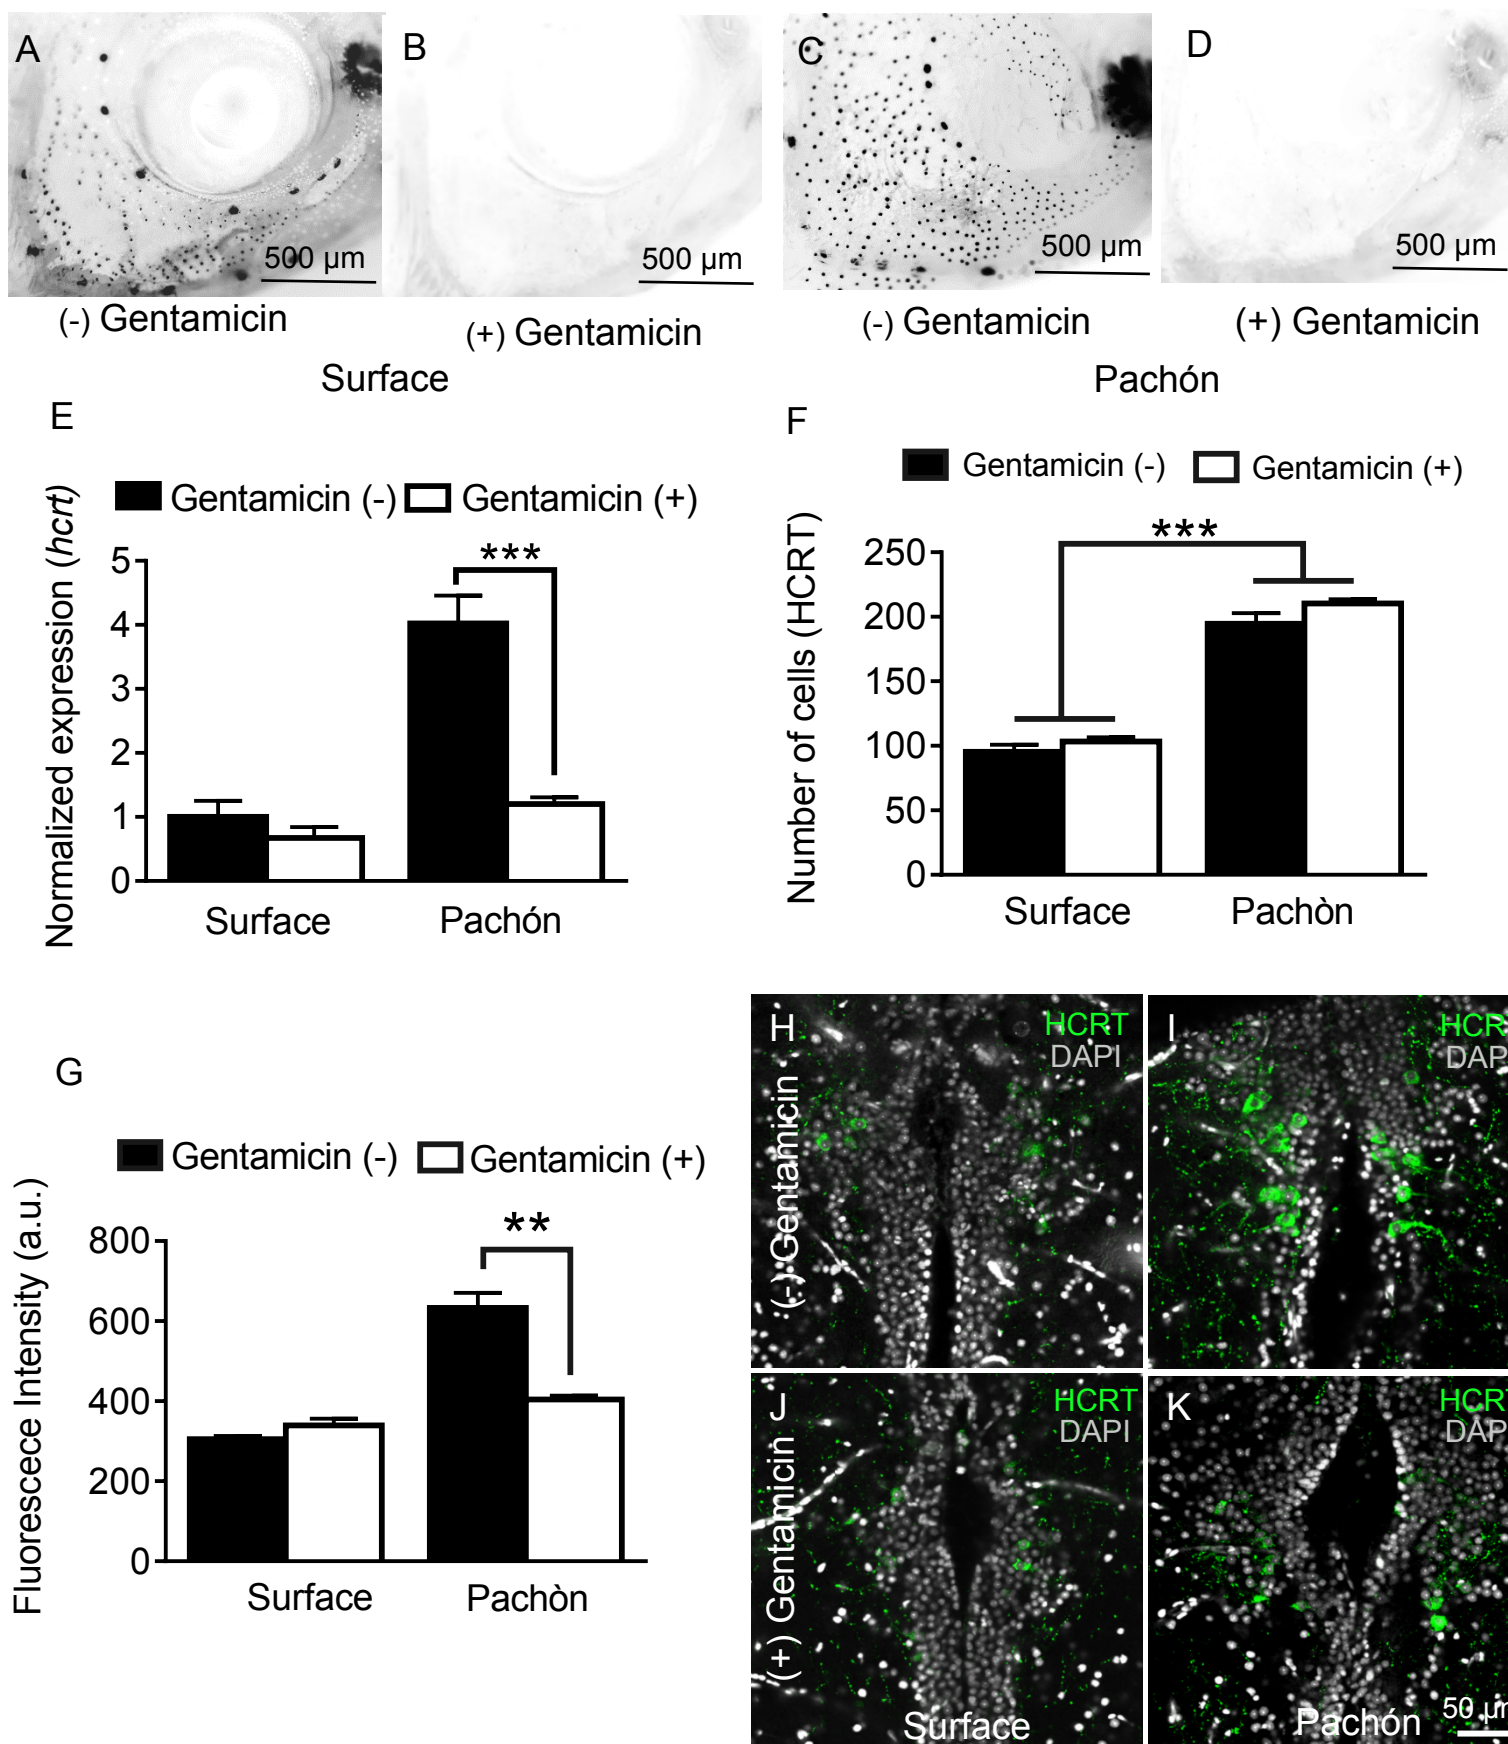

## Figure 4

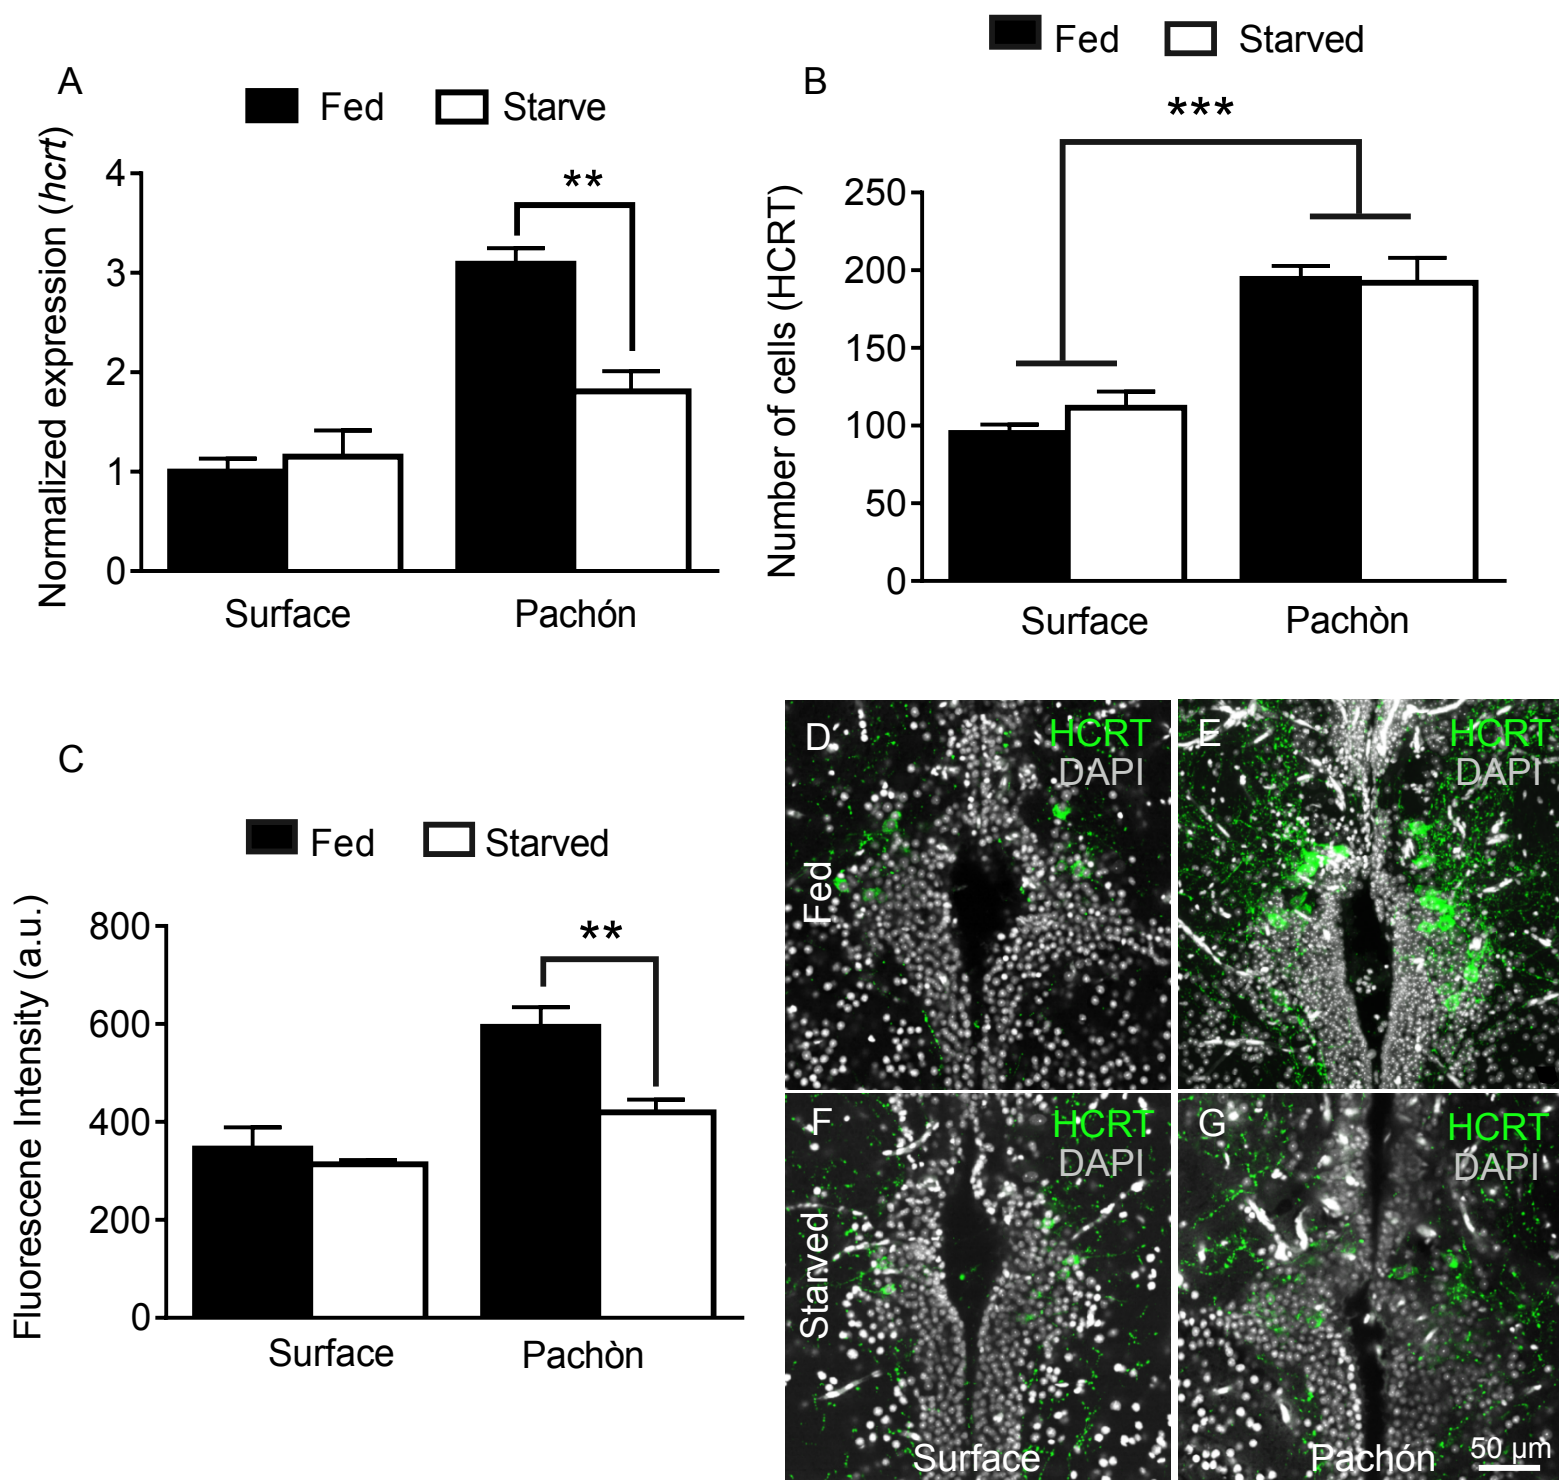

Source: http://biorxiv.org/content/10.1101/122903v1.full.pdf
